# Supplementary material for: Synthesis and Characterization of Nanomaterial Based on Halloysite and Hectorite Clay Minerals Covalently Bridged
Source: PubMed Central journal article supplement (PMC7922904; doi:10.3390/nano11020506), 2021-02-17
Supplement: nanomaterials-11-00506-s001.pdf [file nanomaterials-11-00506-s001.pdf]

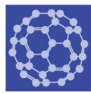

Supply

# Synthesis and Characterization of Nanomaterial Based on Halloysite and Hectorite Clay Minerals Covalently Bridged

Marina Massaro <sup>1</sup>, Cesar Viseras Iborra <sup>2,3,\*</sup>, Giuseppe Cavallaro <sup>4,5</sup>, Carmelo Giuseppe Colletti <sup>1</sup>, Fátima García-Villén <sup>2</sup>, Giuseppe Lazzara <sup>4,5</sup> and Serena Riela <sup>1,\*</sup>

- <sup>1</sup> Department of Biological, Chemical and Pharmaceutical Sciences and Technologies, University of Palermo Viale delle Scienze, Ed. 17 90128 Palermo, Italy; marina.massaro@unipa.it (M.M.); carmelogiuseppe.colletti@unipa.it (C.G.C.)
  - <sup>2</sup> Department of Pharmacy and Pharmaceutical Technology, Faculty of Pharmacy. University of Granada, Campus of Cartuja, 18071 s/n Granada, Spain; fgarvillen@ugr.es
  - <sup>3</sup> Andalusian Institute of Earth Sciences, CSIC-UGR. Avenida de las Palmeras 4, 18100 Armilla, Granada, Spain
  - <sup>4</sup> Department of Physics and Chemistry, University of Palermo, Palermo 90128, Italy; giuseppe.cavallaro@unipa.it (G.C.); giuseppe.lazzara@unipa.it (G.L.)
  - <sup>5</sup> National Interuniversity Consortium of Materials Science and Technology (INSTM), Research Unit of Palermo, Via G. Giusti, 9, 50121 Florence, Italy
- \* Correspondence: cviseras@ugr.es (C.V.I.); serena.riela@unipa.it (S.R.)

**Citation:** Massaro, M.; Iborra, C.V.; Cavallaro, G.; Colletti, C.G.; García-Villén, F.; Lazzara, G.; Riela, S. Synthesis and Characterization of Nanomaterial Based on Halloysite and Hectorite Clay Minerals Covalently Bridged. *Nanomaterials* **2021**, *11*, 506. <https://doi.org/10.3390/nano11020506>

Academic Editor:

Received: 26 January 2021

Accepted: 15 February 2021

Published: date

**Publisher's Note:** MDPI stays neutral with regard to jurisdictional claims in published maps and institutional affiliations.

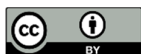

**Copyright:** © 2021 by the authors. Submitted for possible open access publication under the terms and conditions of the Creative Commons Attribution (CC BY) license (<http://creativecommons.org/licenses/by/4.0/>).

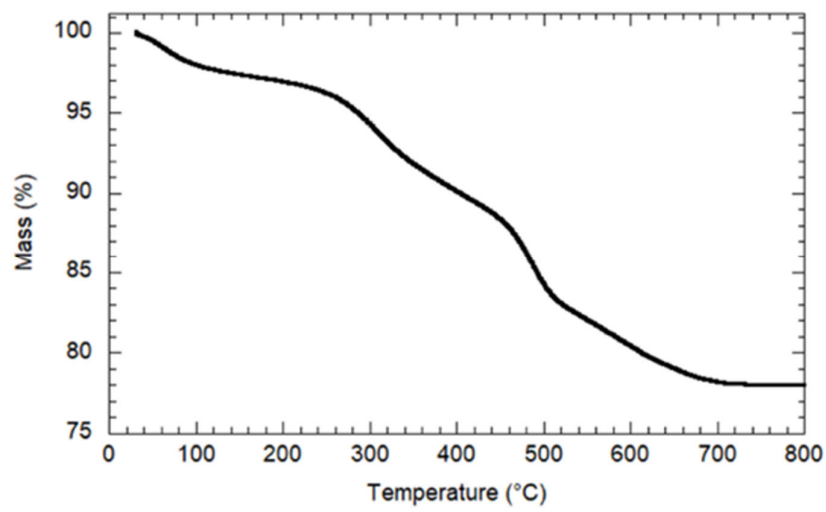

**Figure S1.** Thermogravimetric curve for HNTs-Ht nanomaterial.

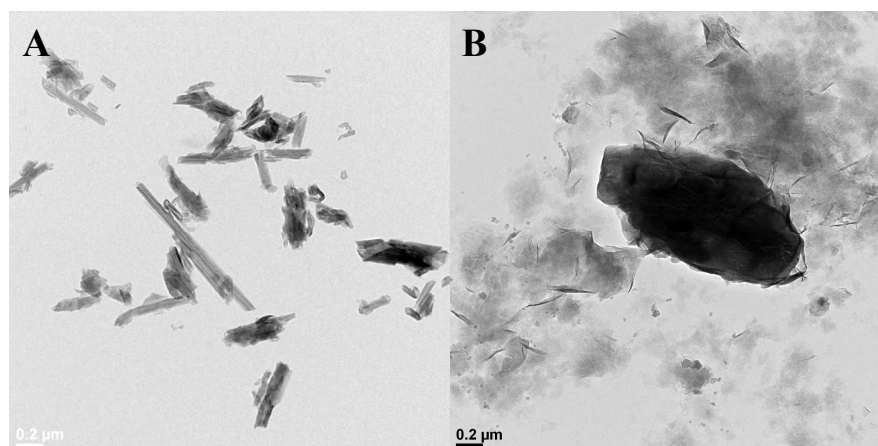

**Figure S2.** TEM images of (a) pristine HNTs; (b) pristine Ht.

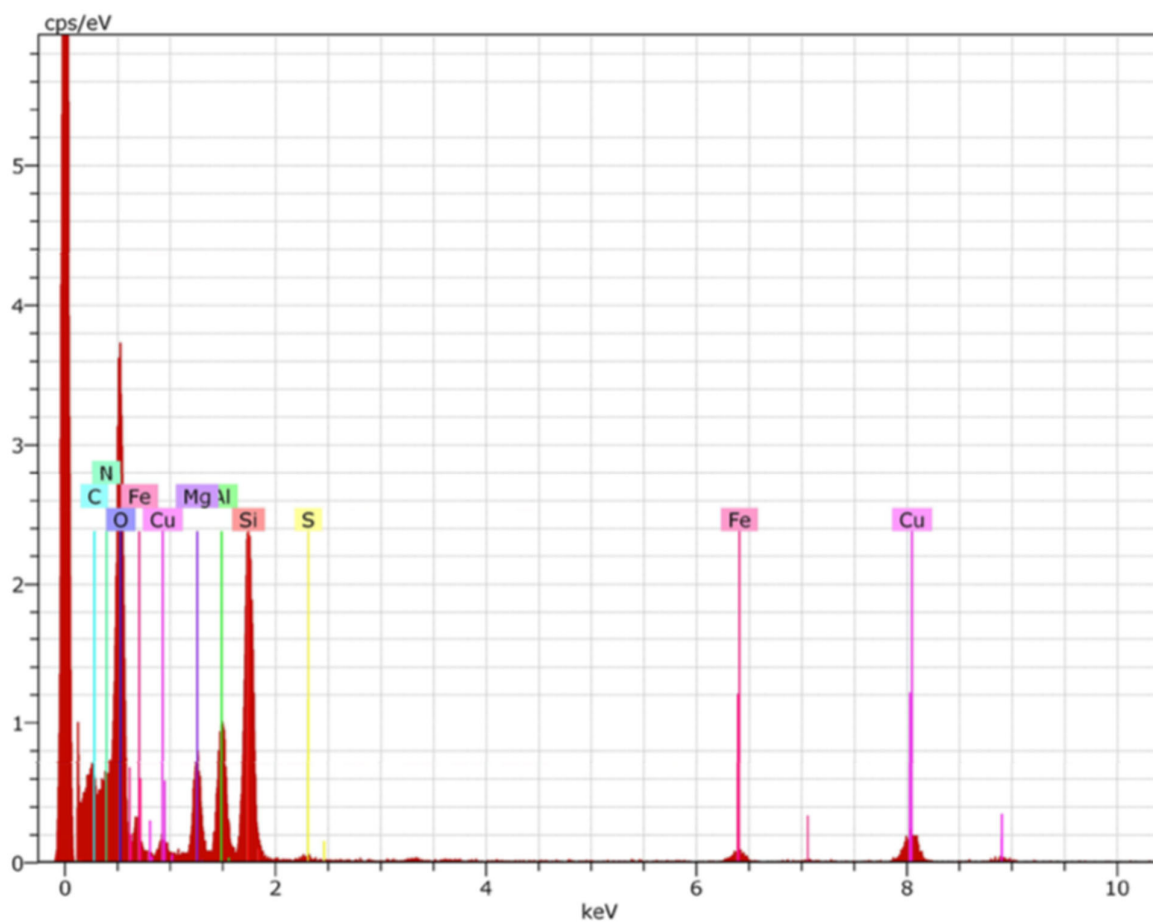

Figure S3. EDX spectrum of the HNTs-Ht nanomaterial.

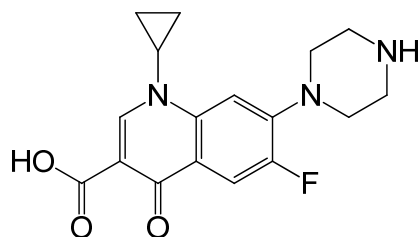

Ciprofloxacin is widely used as antibiotics to treat several types of inflammations including skin infections since they are among the most used broad-spectrum antibiotics active against both Gram-positive and Gram-negative bacteria (Campoli-Richards et al., 1988).

Ciprofloxacin is a zwitterionic molecule which possesses a pH-dependent speciation ( $pK_{a1} = 6.1$  and  $pK_{a2} = 8.7$ ), it is soluble in acidic aqueous medium, but it is insoluble in alcohols. Therefore, ciprofloxacin exists mainly in cationic form at  $pH < 4.0$ , in cationic and zwitterionic form at  $4.0 < pH < 8.0$  and in anionic form at  $pH > 8.0$  (Li et al., 2017).

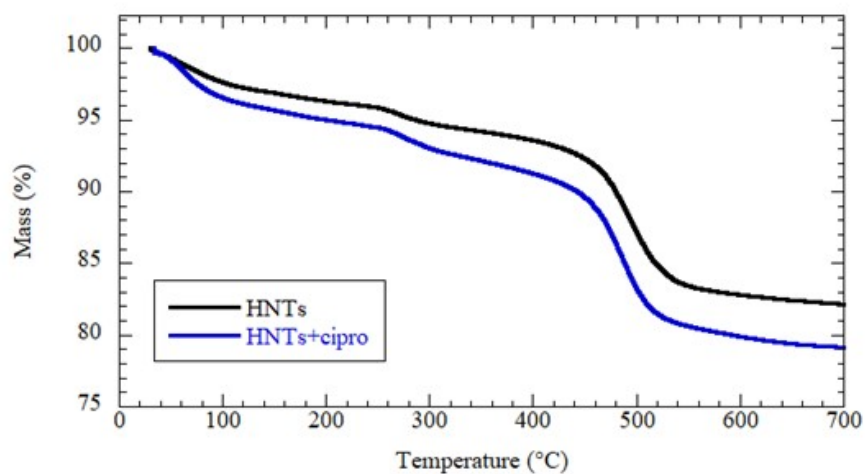

(a)

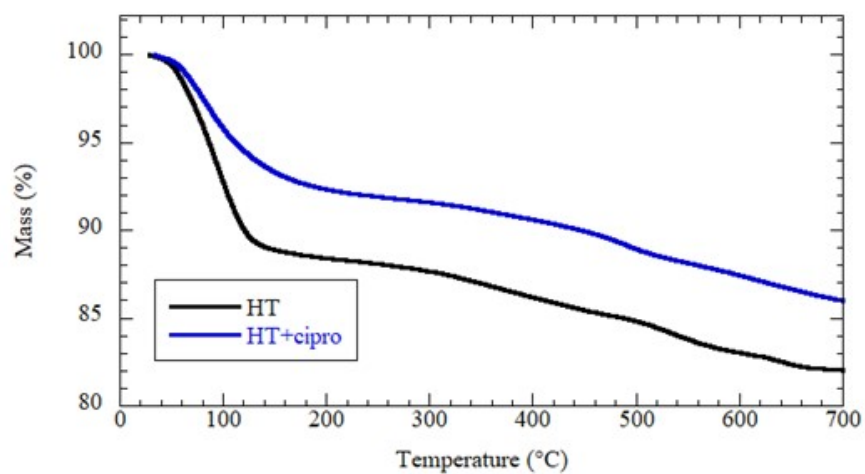

(b)

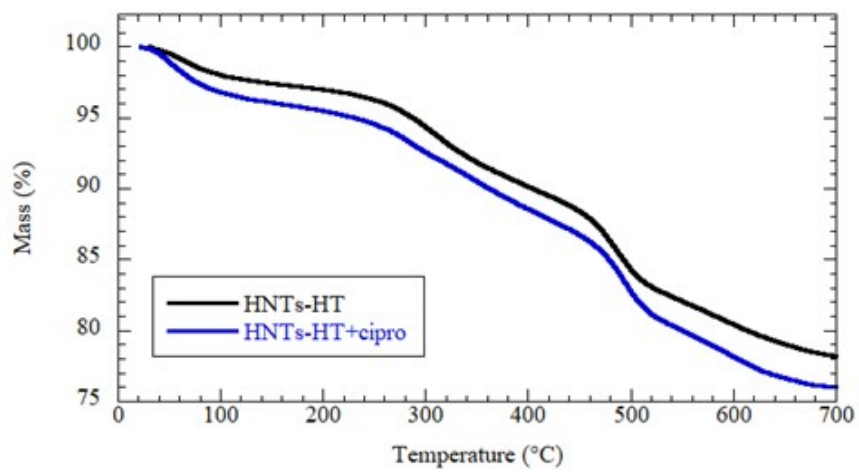

(c)  
**Figure S4.** Thermogravimetric curves of (a) HNTs, (b) Ht and (c) HNTs-HT nanomaterials loaded with ciprofloxacin.

## References

1. Campoli-Richards, D.M., Monk, J.P., Price, A., Benfield, P., Todd, P.A., Ward, A., 1988. Ciprofloxacin. *Drugs* 35, 373-447.
2. Li, S., Zhang, X., Huang, Y., 2017. Zeolitic imidazolate framework-8 derived nanoporous carbon as an effective and recyclable adsorbent for removal of ciprofloxacin antibiotics from water. *Journal of Hazardous Materials* 321, 711-719.
